# Supplementary material
Source: PubMed Central journal article supplement (PMC7384330)
Supplement: NIHMS1605730-supplement-1.pdf [file NIHMS1605730-supplement-1.pdf]

## Supplemental Data

**Prosocial effects of an oxytocin metabolite, but not synthetic oxytocin receptor agonists, in a mouse model of autism**

Sheryl S. Moy, Brian L. Teng, Viktoriya D. Nikolova, Natallia V. Riddick, Catherine D. Simpson, Amy Van Deusen, William P. Janzen, Maria F. Sassano, Cort A. Pedersen, and Michael B. Jarstfer

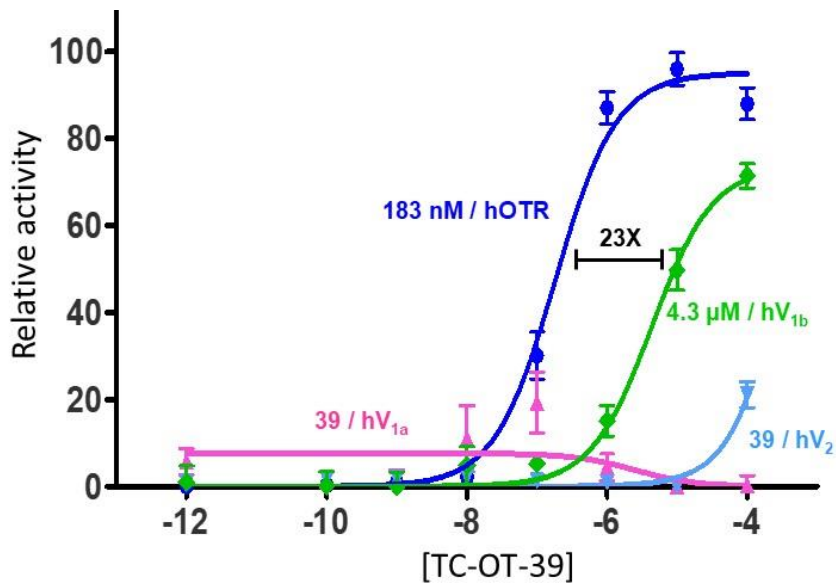

**Supplemental Figure 1.** Dose response curves for the fluorescence-based intracellular calcium mobilization assay for TC-OT-39 against hOXTR and the Avp receptor family. Results are reported as normalized % activation, normalized to activity at hOXTR. Each data point is mean  $\pm$  SD (n=4).

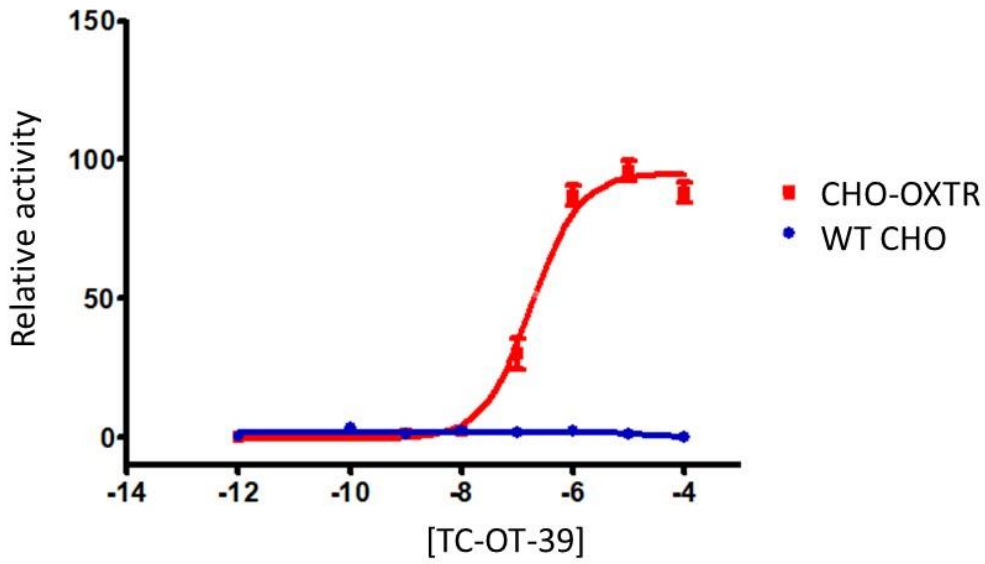

**Supplemental Figure 2.** WT CHO cells do not respond to OTXR agonist TC-OT-39. Dose response curves for TC-OT-39 treatment of WT-CHO or hOXTR-expressing CHO cells using a fluorescence-based intracellular calcium mobilization assay.

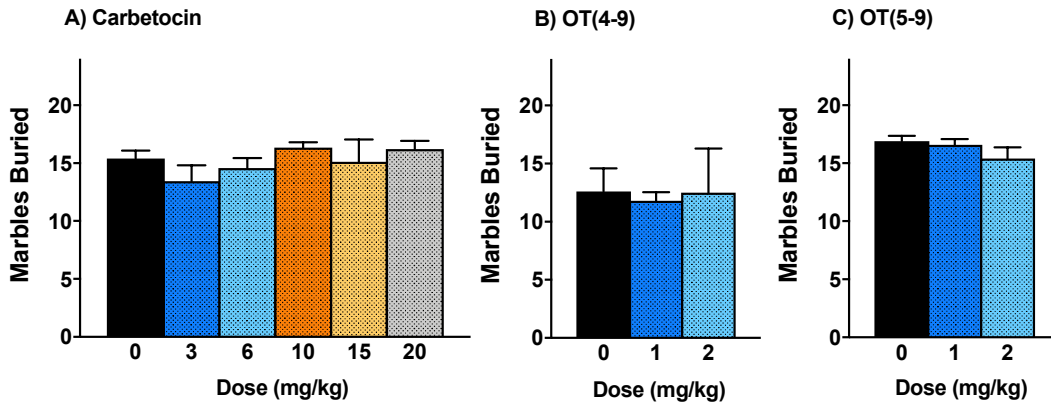

**Supplemental Figure 3. Effects of carbetocin and two oxytocin metabolites on marble burying.** Compounds were administered 50 min before the test. BALB/cByJ mice were given one test per week, with order of dose balanced across weeks. Separate sets of mice were used for each compound. Data are means (+SEM) from 4-18 male mice.

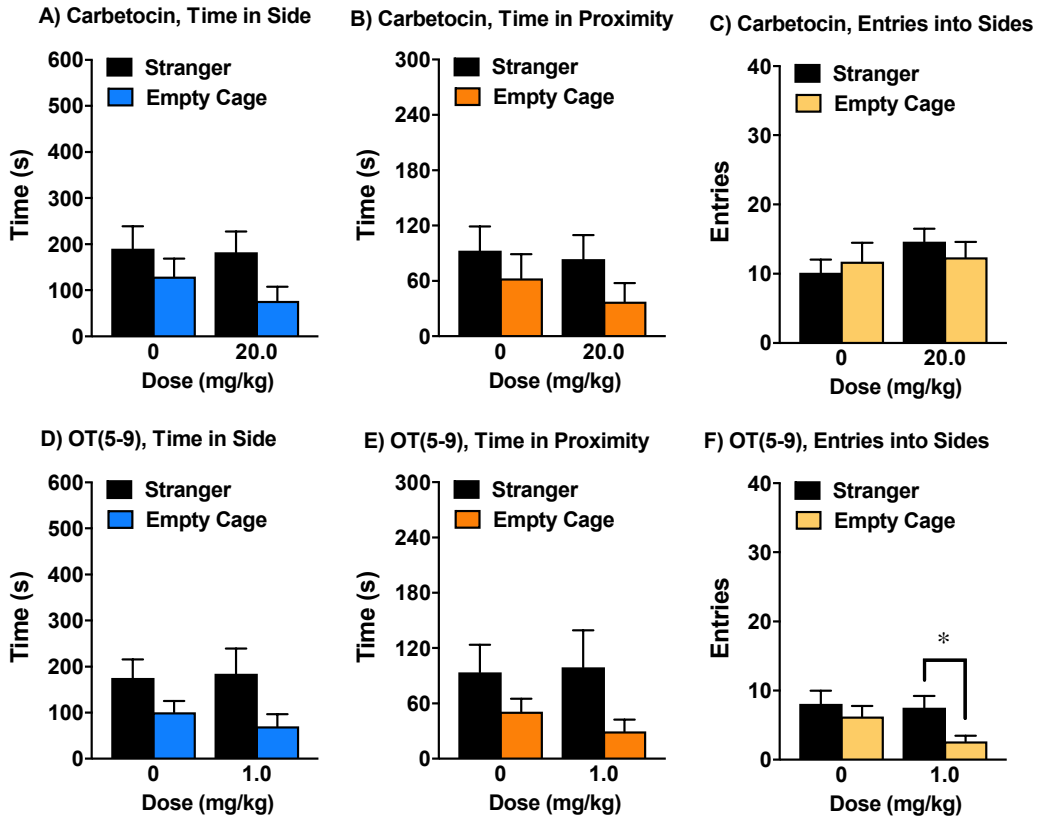

**Supplemental Figure 4. Lack of carbetocin (20 mg/kg) or OT(5-9) (1.0 mg/kg) effects on sociability in a 3-chamber choice test.** The subchronic regimen consisted of 4 treatments with either vehicle or OT(5-9) across an 8-9 day period. Separate sets of mice were used for each compound. Mice were tested 24 hr following the final treatment. Data are means (+SEM) from 12 BALB/cByJ male mice per treatment group. \* $p < 0.05$ .

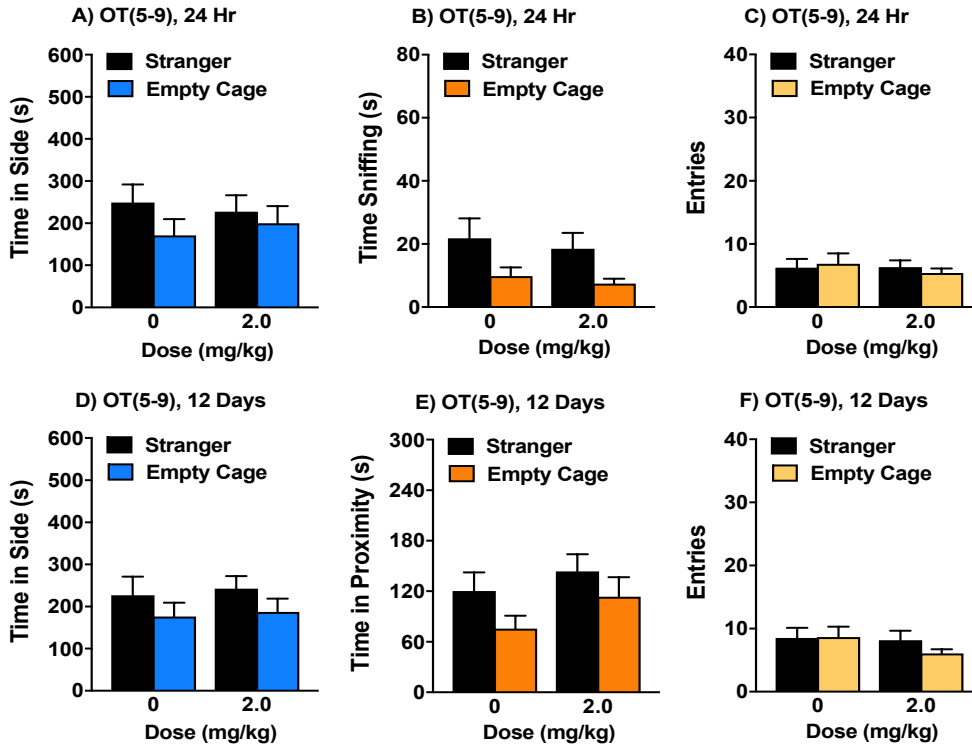

**Supplemental Figure 5. No significant effects of OT(5-9), 2.0 mg/kg, on sociability in a 3-chamber choice test.** The subchronic regimen consisted of 4 treatments with either vehicle or OT(5-9) across an 8-9 day period. A-C) mice were tested for social approach 24 hr following the final treatment. D-F) Mice were tested a second time 12 days following the final treatment. Data are means (+SEM) from 12 BALB/cByJ male mice per treatment group.
